# Supplementary material
Source: publisher figshare collection journal article supplement (https://karger.figshare.com/ndownloader/files/8711449)
Supplement: Supplementary file 1 [file 8711449]

## SUPPLEMENTARY ONLINE MATERIALS

**Tab. S1: Reaction of their environment toward patients with anorexia nervosa**

|                              | Incompre-<br>hension /<br>criticism /<br>discussion /<br>accusations /<br>punishments | Withdrawal | Ignoring my<br>problem | Support /<br>going with<br>me to the<br>doctor | Admiration/<br>jealousy | Concern | Response<br>rate |
|------------------------------|---------------------------------------------------------------------------------------|------------|------------------------|------------------------------------------------|-------------------------|---------|------------------|
| Parents                      | 58.8                                                                                  | 8.8        | 5.9                    | 82.4                                           | 0.0                     | 94.1    | 94%              |
| Siblings                     | 34.5                                                                                  | 31.0       | 27.6                   | 24.1                                           | 0.0                     | 72.4    | 81%              |
| Other family<br>members      | 38.7                                                                                  | 9.7        | 16.1                   | 19.4                                           | 0.0                     | 87.1    | 86%              |
| Classmates/<br>colleagues    | 19.4                                                                                  | 29.0       | 25.8                   | 9.7                                            | 19.4                    | 54.8    | 86%              |
| Boyfriend                    | 33.3                                                                                  | 5.6        | 16.7                   | 33.3                                           | 0.0                     | 66.7    | 50%              |
| Friends                      | 29.0                                                                                  | 32.3       | 12.9                   | 38.7                                           | 25.8                    | 71.0    | 86%              |
| Teachers/ superiors          | 10.0                                                                                  | 0.0        | 33.3                   | 26.7                                           | 0.0                     | 70.0    | 83%              |
| Physicians/<br>psychologists | 17.9                                                                                  | 0.0        | 0.0                    | 60.7                                           | 0.0                     | 57.1    | 78%              |

**Legend to Tab. S1:** The response data to question 60 of the QSAN on the reaction of former patients' environment to symptoms related to anorexia nervosa ("How do people in your environment react to your disease?" [more than one option could be checked]).

**Tab. S2: Questions on aspects of public stigma and discrimination**

| Question                                                                                                        | Never (0) | Rarely (1) | Often (2) | Very often (3) | Median | Mode  | Mean | Response rate |
|-----------------------------------------------------------------------------------------------------------------|-----------|------------|-----------|----------------|--------|-------|------|---------------|
| Do you feel being stared at by other people?                                                                    | 14.7      | 64.7       | 14.7      | 5.9            | 1      | 1     | 1.1  | 94%           |
| Do people withdraw from you when they learn about your eating disorder?                                         | 59.3      | 14.8       | 14.8      | 11.1           | 0      | 0     | 0.8  | 75%           |
| Do people who know about your eating disorder treat you decently?                                               | 0.0       | 6.7        | 43.3      | 50.0           | 2.5    | 3     | 2.4  | 83%           |
| Do your friends support you when they learn about your eating disorder?                                         | 6.7       | 20.0       | 36.7      | 36.7           | 2      | 2 & 3 | 2.0  | 83%           |
| Do classmates, teachers, colleagues and superiors support you when they learn about your eating disorder?       | 11.1      | 29.6       | 37.0      | 22.2           | 2      | 2     | 1.7  | 75%           |
| Have you been rejected for a job because people learned that you have an eating disorder?                       | 54.5      | 27.3       | 9.1       | 9.1            | 0      | 0     | 0.7  | 31%           |
| Have you been rejected by a private health insurance / additional health insurance due to your eating disorder? | no: 81.0  | yes: 19.0  | n.a.      | n.a.           | 0      | 0     | 0.2  | 58%           |
| Have you been excluded from voluntary or social work due to your eating disorder?                               | 86.4      | 13.6       | 0.0       | 0.0            | 0      | 0     | 0.1  | 61%           |
| Do you have difficulties in finding a place to live because of your eating disorder?                            | 92.9      | 7.1        | 0.0       | 0.0            | 0      | 0     | 0.1  | 39%           |
| Have you been denied educational opportunities or professional training measures due to your eating disorder?   | 61.1      | 27.8       | 5.6       | 5.6            | 0      | 0     | 0.6  | 50%           |
| Have your friends withdrawn from you due to your eating disorder?                                               | 50.0      | 25.0       | 9.4       | 15.6           | 0.5    | 0     | 0.9  | 89%           |
| Do you feel excluded by people of your own age group?                                                           | 36.4      | 33.3       | 15.2      | 15.2           | 1      | 0     | 1.1  | 92%           |
| Do you sense that people have a negative view of you because of your eating disorder?                           | 16.7      | 43.3       | 26.7      | 13.3           | 1      | 1     | 1.4  | 83%           |
| Have you heard other people saying negative or derogative things about persons with eating disorders?           | 6.1       | 48.5       | 39.4      | 6.1            | 1      | 1     | 1.5  | 92%           |
| Do you find the reports in media (e.g. TV, movies, books) on people with anorexia nervosa appropriate?          | 21.2      | 45.5       | 30.3      | 3.0            | 1      | 1     | 1.2  | 92%           |

**Tab. S2 (cont.)**

| Question                                                                                                           | Totally disagree (0) | Rather disagree (1) | Rather agree (2) | Totally agree (3) | Median | Mode  | Mean | Response rate |
|--------------------------------------------------------------------------------------------------------------------|----------------------|---------------------|------------------|-------------------|--------|-------|------|---------------|
| People think negatively about me because I have undergone psychiatric/ psychotherapeutic treatment.                | 40.6                 | 31.3                | 25.0             | 3.1               | 1      | 0     | 0.9  | 89%           |
| All in all, I am being criticized more now than prior to my eating disorder.                                       | 34.4                 | 37.5                | 12.5             | 15.6              | 1      | 1     | 1.1  | 89%           |
| Being criticized for my eating disorder has been too much of a burden for me.                                      | 23.3                 | 23.3                | 20.0             | 33.3              | 2      | 3     | 1.6  | 83%           |
| Because of my eating disorder, it is difficult to find a boyfriend.                                                | 50.0                 | 21.9                | 15.6             | 12.5              | 0.5    | 0     | 0.9  | 89%           |
| Most people accept someone with anorexia nervosa as a close friend.                                                | 14.7                 | 35.3                | 41.2             | 8.8               | 1.5    | 2     | 1.4  | 94%           |
| Most employers do not mind employing someone with anorexia nervosa as long as the person is qualified for the job. | 29.4                 | 41.2                | 20.6             | 8.8               | 1      | 1     | 1.1  | 94%           |
| Most people treat people with anorexia nervosa like anyone else.                                                   | 34.3                 | 42.9                | 17.1             | 5.7               | 1      | 1     | 0.9  | 97%           |
| Most people do not like to date someone who has undergone inpatient treatment for anorexia nervosa.                | 31.4                 | 31.4                | 22.9             | 14.3              | 1      | 0 & 1 | 1.2  | 97%           |

**Legend to Tab. 2:** The descriptive response data obtained from former patients with anorexia nervosa to the QSAN questions on aspects of public stigmatization and discrimination.

**Tab. S3: Questions on aspects of self-stigmatization**

| <b>Question</b>                                                            | <b>Never<br/>(0)</b>                | <b>Rarely<br/>(1)</b>              | <b>Often<br/>(2)</b>            | <b>Very often<br/>(3)</b>        | <b>Media<br/>n</b> | <b>Mode</b> | <b>Mean</b> | <b>Response<br/>rate</b> |
|----------------------------------------------------------------------------|-------------------------------------|------------------------------------|---------------------------------|----------------------------------|--------------------|-------------|-------------|--------------------------|
| Do you feel different from people of your age group?                       | 9.4                                 | 28.1                               | 34.4                            | 28.1                             | 2                  | 2           | 2.8         | 89%                      |
| Do you avoid telling other people about your eating disorder?              | 18.8                                | 6.3                                | 31.3                            | 43.8                             | 2                  | 3           | 2.0         | 89%                      |
| Do you feel responsible for your anorexia?                                 | 3.0                                 | 27.3                               | 36.4                            | 33.3                             | 2                  | 2           | 2.0         | 92%                      |
| <b>Question</b>                                                            | <b>Totally<br/>disagree<br/>(0)</b> | <b>Rather<br/>disagree<br/>(1)</b> | <b>Rather<br/>agree<br/>(2)</b> | <b>Totally<br/>agree<br/>(3)</b> | <b>Media<br/>n</b> | <b>Mode</b> | <b>Mean</b> | <b>Response<br/>rate</b> |
| Being criticized for my disease has greatly influenced my self-confidence. | 29.0                                | 38.7                               | 9.7                             | 22.6                             | 1                  | 1           | 1.3         | 86%                      |

**Tab. S3 (cont.)**

| Question                                                                                               | Totally disagree<br>(0) | Rather disagree<br>(1) | Rather agree<br>(2) | Totally agree<br>(3) | Median | Mode | Mean | Response rate |
|--------------------------------------------------------------------------------------------------------|-------------------------|------------------------|---------------------|----------------------|--------|------|------|---------------|
| Young women or girls with anorexia nervosa ...                                                         |                         |                        |                     |                      |        |      |      |               |
| ... are a danger to others.                                                                            | 68.6                    | 20.0                   | 11.4                | 0.0                  | 0      | 0    | 0.4  | 97%           |
| ... have themselves to blame for their condition                                                       | 26.5                    | 44.1                   | 26.5                | 2.9                  | 1      | 1    | 1.1  | 94%           |
| ... could pull themselves together if they really wanted to.                                           | 51.5                    | 18.2                   | 24.2                | 6.1                  | 0      | 0    | 0.9  | 92%           |
| ... are trying to get attention through their disease.                                                 | 11.4                    | 40.0                   | 31.4                | 17.1                 | 1      | 1    | 1.5  | 97%           |
| ... cannot be healed                                                                                   | 28.6                    | 31.4                   | 37.1                | 2.9                  | 1      | 2    | 1.1  | 97%           |
| ... are unpredictable.                                                                                 | 22.9                    | 34.3                   | 22.9                | 20.0                 | 1      | 1    | 1.4  | 97%           |
| ... feel differently than other people.                                                                | 0.0                     | 14.3                   | 54.3                | 31.4                 | 2      | 2    | 2.2  | 97%           |
| Question                                                                                               | Totally disagree<br>(0) | Rather disagree<br>(1) | Rather agree<br>(2) | Totally agree<br>(3) | Median | Mode | Mean | Response rate |
| It is exhausting to talk with young women/ girls with anorexia nervosa.                                | 8.8                     | 35.3                   | 38.2                | 17.6                 | 2      | 2    | 1.7  | 94%           |
| The overall health state of young women / girls with anorexia nervosa cannot be improved by treatment. | 37.1                    | 42.9                   | 17.1                | 2.9                  | 1      | 1    | 0.9  | 97%           |

**Legend to Tab. S3:** The descriptive response data obtained from former patients with anorexia nervosa to the QSAN questions on aspects of self-stigmatization.

**Tab. S4: Questions on aspects of consequences of stigmatization**

| Question                                                                                        | Totally disagree (0) | Rather disagree (1) | Rather agree (2) | Totally agree (3) | Median | Mode | Mean | Response rate |
|-------------------------------------------------------------------------------------------------|----------------------|---------------------|------------------|-------------------|--------|------|------|---------------|
| I had hesitated for a long time to see a physician out of fear of being criticized and blamed.  | 41.4                 | 27.6                | 24.1             | 6.9               | 1      | 0    | 1.0  | 81%           |
| I had waited with the decision to undergo a therapy out of fear of being excluded and degraded. | 48.3                 | 17.2                | 24.1             | 10.3              | 1      | 0    | 1.0  | 81%           |

**Legend to Tab. S4:** The descriptive response data obtained from former patients with anorexia nervosa to the QSAN questions on aspects of possible consequences of stigmatization.

**Tab. S5: Questions on aspects of stigmatization in the medical context**

| Question                                                                                           | Never (0) | Rarely (1) | Often (2) | Very often (3) | Median | Mode | Mean | Response rate |
|----------------------------------------------------------------------------------------------------|-----------|------------|-----------|----------------|--------|------|------|---------------|
| Do you have the impression that physicians treat you differently from other patients?              | 55.2      | 24.1       | 20.7      | 0.0            | 0      | 0    | 0.7  | 81%           |
| Do you have the impression that physicians hold you responsible for your eating disorder?          | 50.0      | 28.1       | 21.9      | 0.0            | 0.5    | 0    | 0.7  | 89%           |
| Do you have the impression that physicians hold your parents responsible for your eating disorder? | 61.3      | 29.0       | 9.7       | 0.0            | 0      | 0    | 0.5  | 86%           |

**Legend to Tab. S5:** The descriptive response data obtained from former patients with anorexia nervosa to the QSAN questions on aspects of stigmatization in the medical context.

**Tab. S6: Questions on aspects of stigmatization of the patients' parents**

| Question                                                                                | Never (0)      | Rarely (1)     | Often (2)            | Very often (3)     | Median | Mode | Mean | Response rate |
|-----------------------------------------------------------------------------------------|----------------|----------------|----------------------|--------------------|--------|------|------|---------------|
| Is your mother held responsible or is she criticized for your eating disorder?          | 45.5           | 27.3           | 27.3                 | 0.0                | 1      | 0    | 0.8  | 92%           |
| Is your father held responsible or is he criticized for your eating disorder?           | 51.5           | 27.3           | 21.2                 | 0.0                | 0      | 0    | 0.7  | 92%           |
| Question                                                                                | Not at all (0) | No, hardly (1) | Yes, quite a bit (2) | Yes, very much (3) | Median | Mode | Mean | Response rate |
| Does your mother feel responsible for your disease?                                     | 18.2           | 27.3           | 33.3                 | 21.2               | 2      | 2    | 1.6  | 92%           |
| Does your father feel responsible for your disease?                                     | 21.2           | 39.4           | 27.3                 | 12.1               | 1      | 1    | 1.3  | 92%           |
| Do the accusations and the criticism because of your disease put stress on your mother? | 7.7            | 15.4           | 50.0                 | 26.9               | 2      | 2    | 2.0  | 72%           |
| Do the accusations and the criticism because of your disease put stress on your father? | 7.7            | 34.6           | 30.8                 | 26.9               | 2      | 1    | 1.8  | 72%           |

**Legend to Tab. S6:** The descriptive response data obtained from former patients with anorexia nervosa to the QSAN questions on aspects of stigmatization of the patients' parents.
